# Supplementary material for: New Insights into the Function and Global Distribution of Polyethylene Terephthalate (PET)-Degrading Bacteria and Enzymes in Marine and Terrestrial Metagenomes
Source: PubMed Central journal article supplement (PMC5881046; doi:10.1128/aem.02773-17), 2018-04-02
Supplement: AEM.02773-17_zam008188431s1.pdf [file AEM.02773-17_zam008188431s1.pdf]

## SUPPLEMENTAL FIGURES

1  
2  
3 **FIGURE S1. PET and PCL plate assay to determine activity of PET2, 5 6 and 12.** Activity  
4 against PET and PCL was tested with purified enzyme. Plates were incubated at room  
5 temperature over night or at 50°C over night for PCL and PET respectively. Formation of a halo  
6 confirmed activity.

7  
8 **FIGURE S2. Biochemical characterization of PET2 with different *pNP*-substrates.** Data  
9 obtained with a *pNP*-assay are shown in net diagrams for PET2. Co-factor dependency,  
10 inhibitory substance effect, detergent effect and the effect of different solvents were tested. All  
11 tests were carried out with *pNP*-octanoate.

12  
13 **FIGURE S3. Biochemical characterization of PET6 with different *pNP*-substrates.** Data  
14 obtained with a *pNP*-assay are shown in net diagrams for PET6. Co-factor dependency,  
15 inhibitory substance effect, detergent effect and the effect of different solvents were tested. All  
16 tests were carried out with *pNP*-octanoate.

17  
18 **FIGURE S4. Chromatographic analysis of PET degradation by PET2.** The degradation of  
19 PET foil was observed after 24h of incubation at 60°C. In order to assign the degradation  
20 product to the obtained peaks TPA, BHET and MHET served as reference substances.

21

22  
23  
24  
25  
26  
27  
28  
29  
30  
31

## SUPPLEMENTAL TABLES

**Table S1: Newly identified PET hydrolases (PET1-PET13).** The newly identified PET hydrolases in this work were named PET1-PET13. Besides unspecific hits, the CDD search revealed several specific conserved domain similarities to pfam superfamilys.

**Table S2: Marine and terrestrial metagenomes used for PET hydrolase search.** Data were obtained from IMG. Besides IMG genome ID and sample name, the HMM obtained hits and PET hydrolase frequencies are shown in hits/Mb.

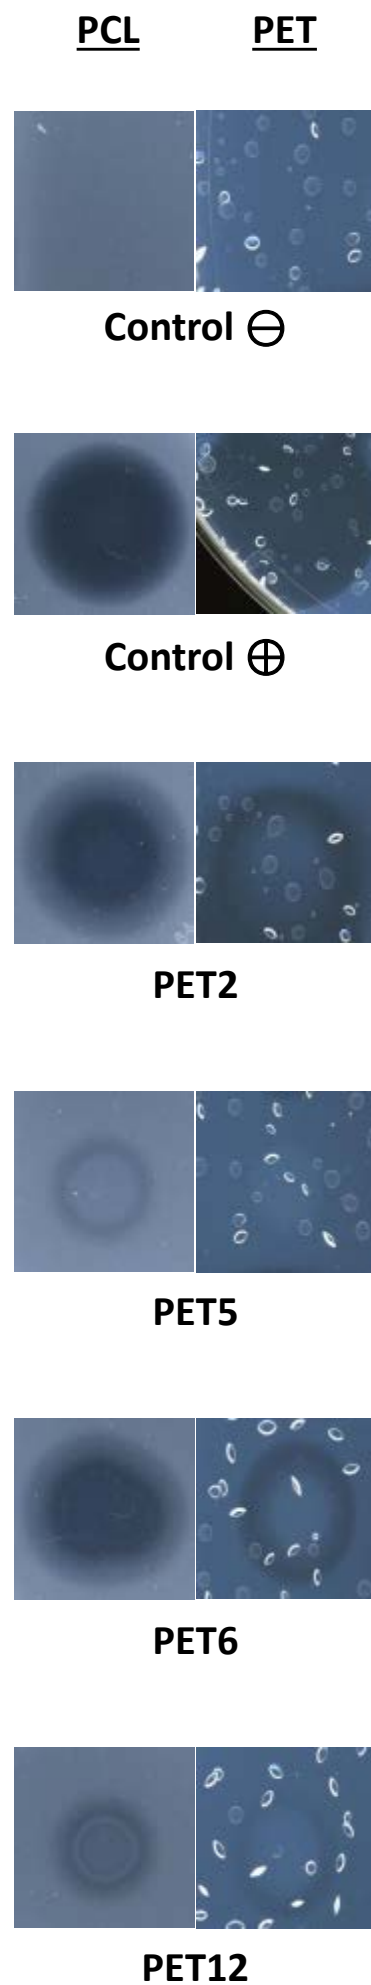

**FIGURE S1. PET and PCL plate assay to determine activity of PET2, 5 6 and 12.** Activity against PET and PCL was tested with purified enzyme. Plates were incubated at room temperature over night or at 50°C over night for PCL and PET respectively. Formation of a halo confirmed activity.

# PET2

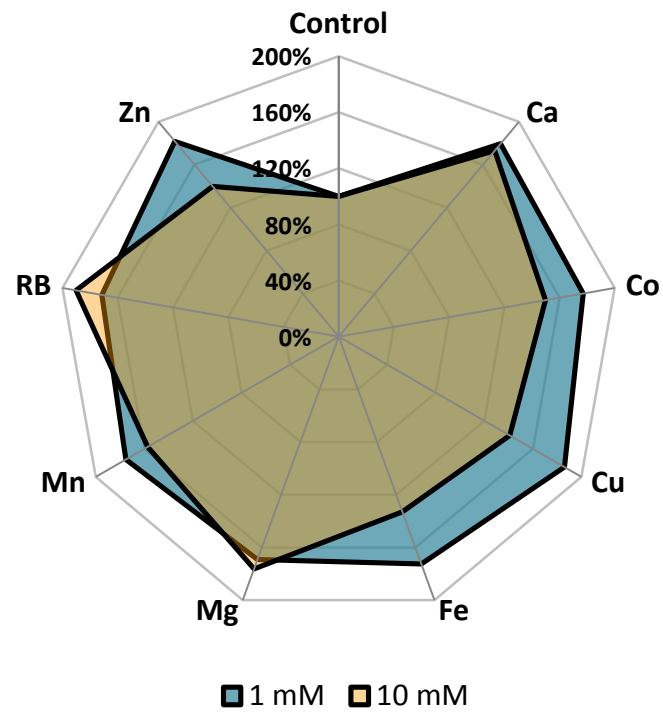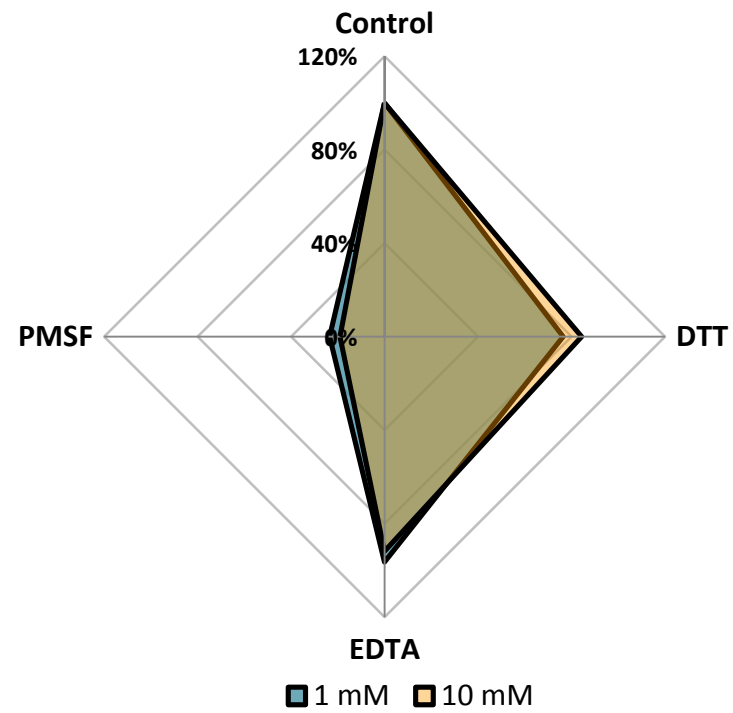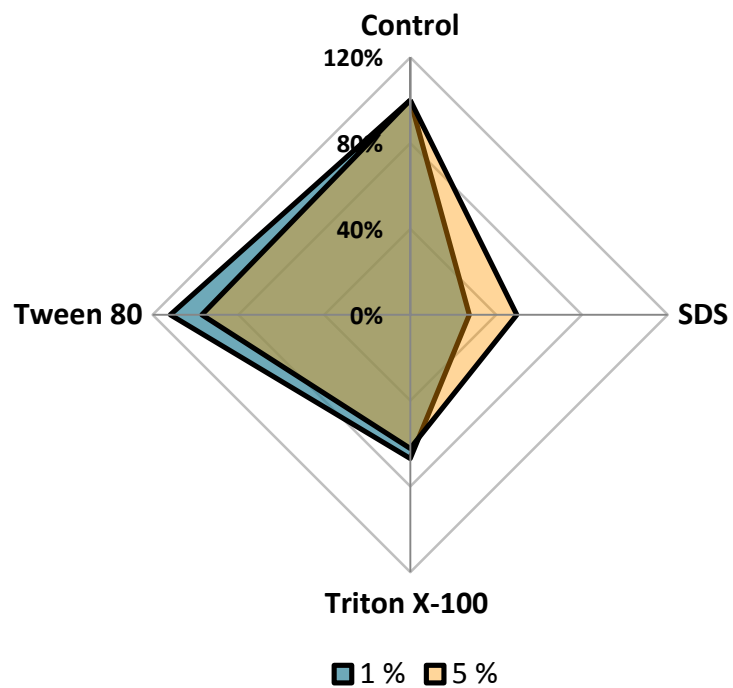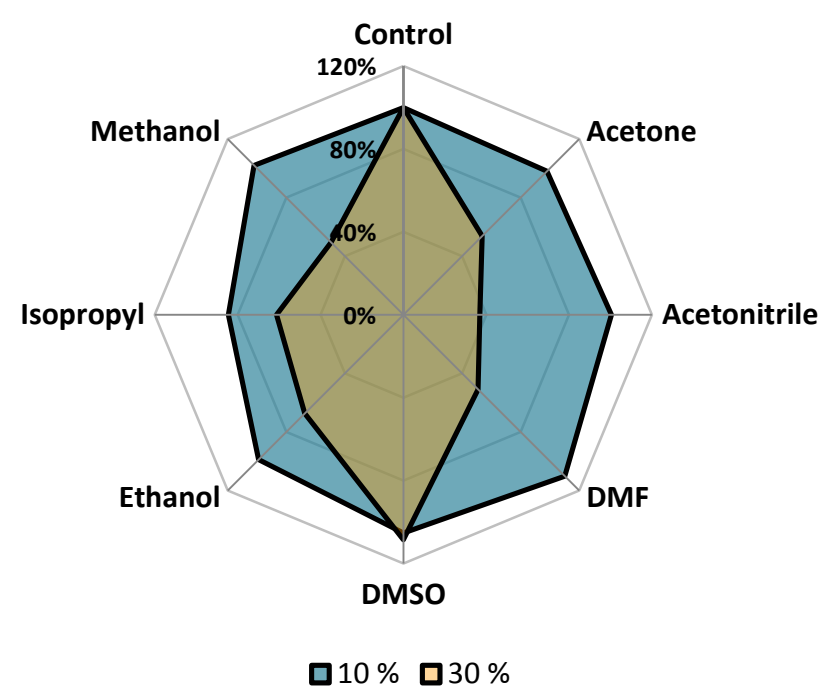

**FIGURE S2. Biochemical characterization of PET2 and PET6 with different *p*NP-substrates.** Data obtained with a *p*NP-assay are shown in net diagrams for PET2. Co-factor dependency, inhibitory substance effect, detergent effect and the effect of different solvents were tested. All tests were carried out with *p*NP-octanoate

# PET6

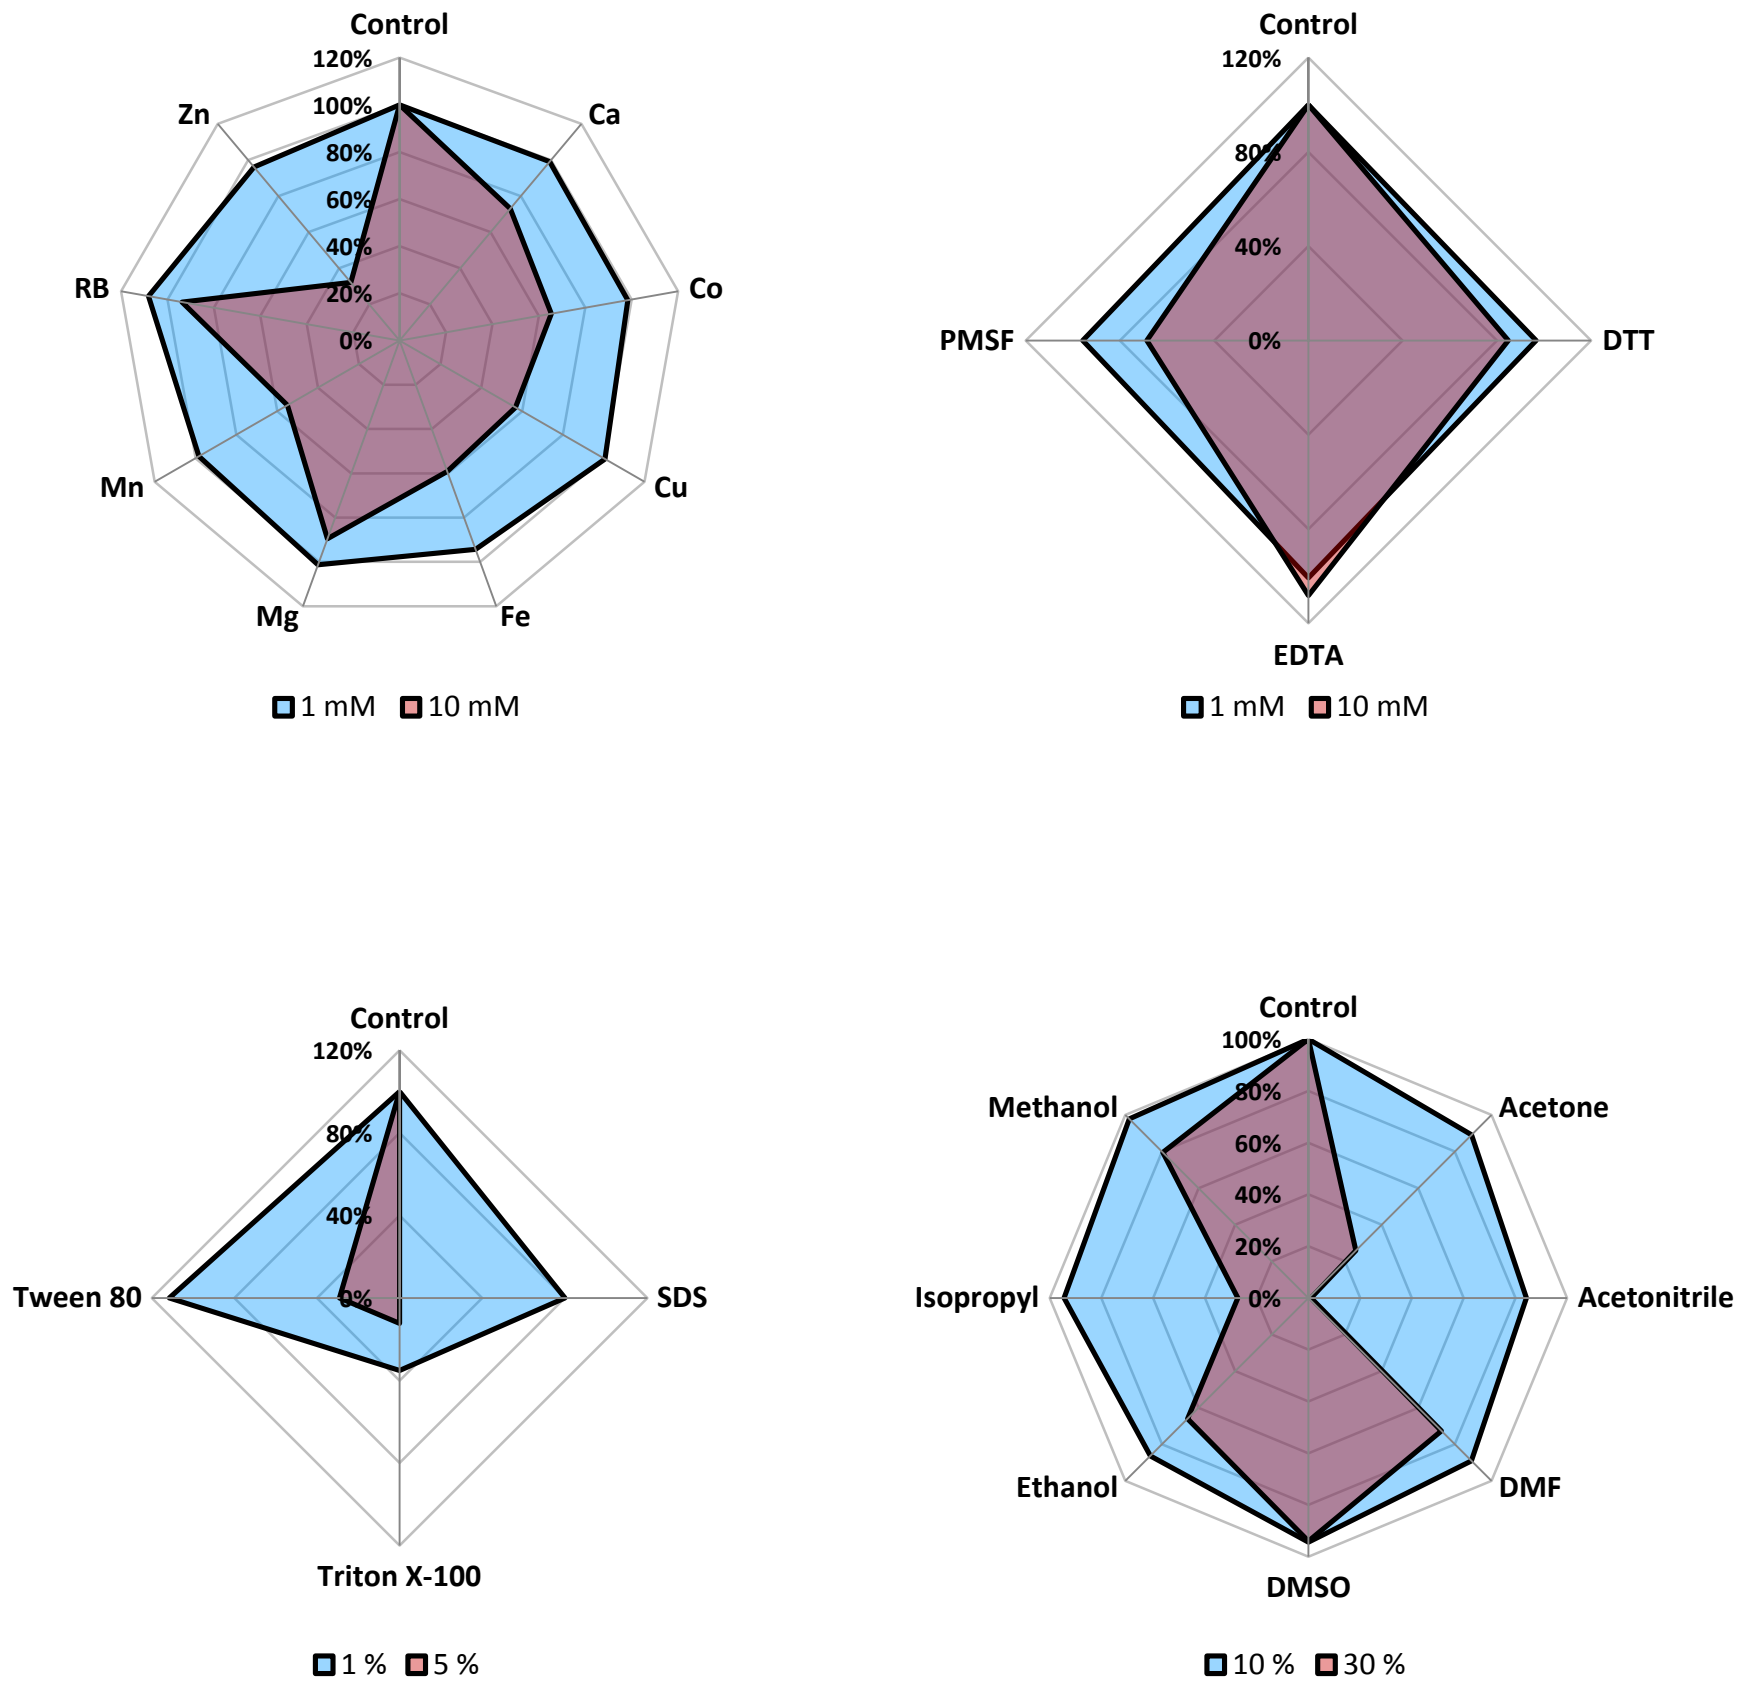

**FIGURE S3. Biochemical characterization of PET6 with different *p*NP-substrates.** Data obtained with a *p*NP-assay are shown in net diagrams for PET6. Co-factor dependency, inhibitory substance effect, detergent effect and the effect of different solvents were tested. All tests were carried out with *p*NP-octanoate.

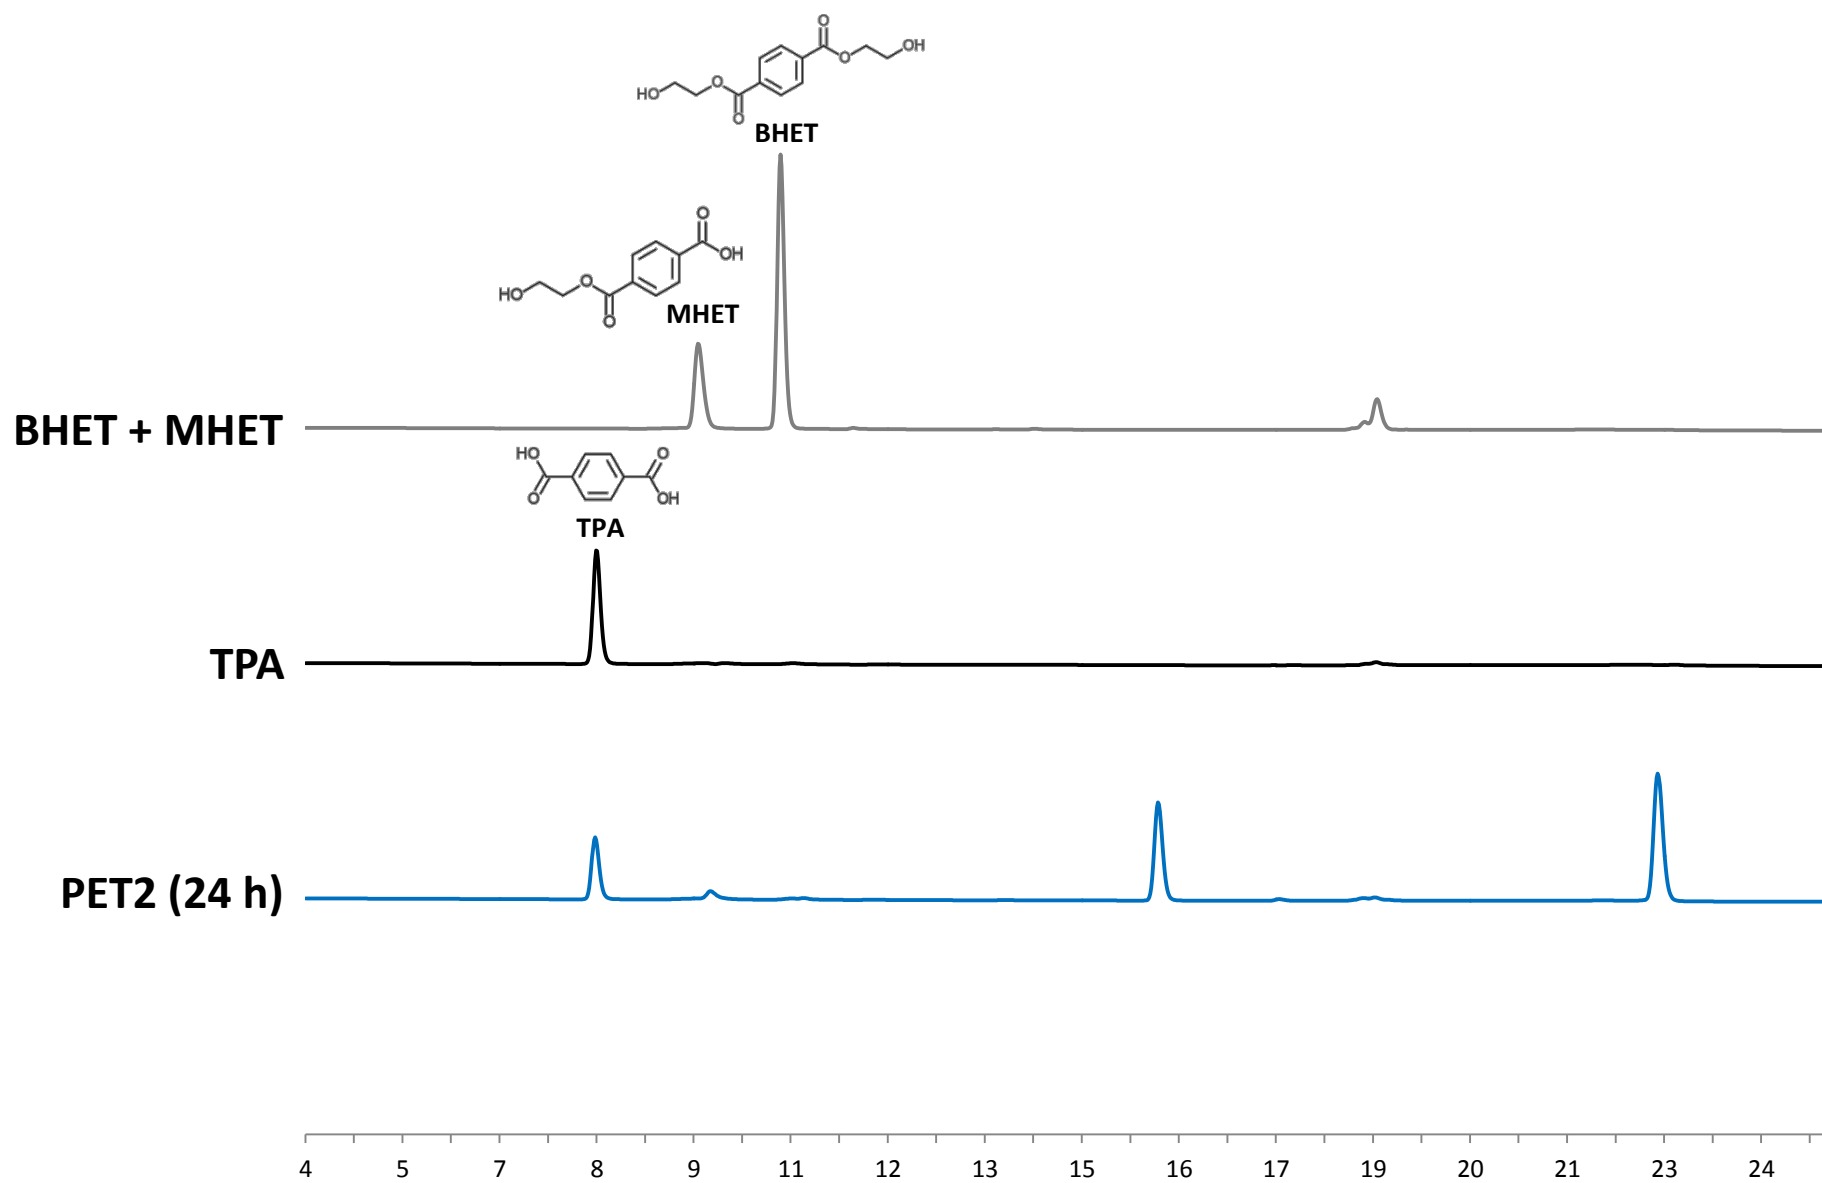

**FIGURE S4. Chromatographic analysis of PET degradation by PET2.** The degradation of PET foil was observed after 24h of incubation at 60°C. In order to assign the degradation product to the obtained peaks TPA, BHET and MHET served as reference substances.

| PET# | UniProt_Entry | Gene name         | Organism                                           | Phylum              | Pfam / CDD ID                                                                                                                                             |
|------|---------------|-------------------|----------------------------------------------------|---------------------|-----------------------------------------------------------------------------------------------------------------------------------------------------------|
| 1    | E8U721        | Deima_1209        | <i>Deinococcus maricopensis</i> (strain DSM 21211) | Deinococcus-Thermus | cl26327, pfam01738, pfam12695, pfam00561, pfam05448, cl27026, pfam12146, cl21494, cl26327, pfam01738, pfam12695, pfam00561, pfam05448, cl27026, pfam12146 |
| 2    | C3RYL0        | lipIAF5-2         | uncultured bacterium                               | n.d                 | cl27026, pfam00326, pfam01738, pfam05448, cl21494, cl27026, pfam00326, pfam01738, pfam05448                                                               |
| 3    | A0A0F9X315    | LCGC14_0200860    | marine sediment metagenome                         | n.d                 | cl27026, pfam01738, pfam05448, cl21494, cl27026, pfam01738, pfam05448                                                                                     |
| 4    | N6VY44        | J057_15340        | <i>Marinobacter nanhaiticus</i> D15-8W             | Proteobacteria      | pfam01738, pfam00326, cl21494, , pfam01738, pfam00326                                                                                                     |
| 5    | R4YKL9        | lipA OLEAN_C07960 | <i>Oleispira antarctica</i> RB-8                   | Proteobacteria      | n.d                                                                                                                                                       |
| 6    | UPI0003945E1F | n.d               | <i>Vibrio gazogenes</i>                            | Proteobacteria      | cl27026, pfam00326, pfam05448, cl21494, cl27026, pfam00326, pfam05448                                                                                     |
| 7    | Q8RR62        | pbsA              | <i>Acidovorax delafieldii</i>                      | Proteobacteria      | n.d                                                                                                                                                       |
| 8    | P19833        | lip1 L1           | <i>Moraxella</i> sp. (strain TA144)                | Proteobacteria      | cl27026, pfam00326, pfam01738, pfam05448, cl21494, cl27026, pfam00326, pfam01738, pfam05448                                                               |
| 9    | A0A0D4L7E6    | est               | <i>Psychrobacter</i> sp. PAMC 21119                | Proteobacteria      | cl27026, pfam00326, pfam01738, pfam05448, cl21494, cl27026, pfam00326, pfam01738, pfam05448                                                               |
| 10   | UPI00064655D2 | n.d               | <i>Methylibium</i> sp.                             | Proteobacteria      | pfam12740, cl21494, pfam12740                                                                                                                             |
| 11   | UPI0003660256 | n.d               | <i>Caldimonas manganoxidans</i>                    | Proteobacteria      | cl26327, pfam01738, pfam00756, pfam12146, pfam03403, cl21494, cl26327, pfam01738, pfam00756, pfam12146, pfam03403                                         |

|    |            |             |                                      |                |                                                                                                                            |
|----|------------|-------------|--------------------------------------|----------------|----------------------------------------------------------------------------------------------------------------------------|
| 12 | A0A0G3BI90 | AAW51_2473  | <i>[Polyangium]<br/>brachysporum</i> | Proteobacteria | cl27026, pfam00326, pfam01738,<br>pfam05448, pfam12695, cl21494,<br>cl27026, pfam00326, pfam01738,<br>pfam05448, pfam12695 |
| 13 | A0A1F4G492 | A2711_12500 | <i>Burkholderiales<br/>bacterium</i> | Proteobacteria | cl21494, cl21494, pfam12740,<br>pfam12695, pfam00756, pfam01738,<br>pfam07224, pfam03403                                   |



## Terrestrial metagenomes

| IMG Genome ID | Genome Name / Sample Name                                                                                                                                                     | Latitude  | Longitude   | Genome Size *<br>assembled | Gene Count *<br>assembled | #Hits | Hits/GB |
|---------------|-------------------------------------------------------------------------------------------------------------------------------------------------------------------------------|-----------|-------------|----------------------------|---------------------------|-------|---------|
| 2070309004    | Green-waste compost microbial communities at University of California, Davis, USA, from solid state bioreactor - Luquillo Rain Forest, Puerto Rico                            | 18.311389 | -65.8375    | 281407472                  | 781631                    | 1     | 0.004   |
| 2119805012    | Soil microbial communities from sample at FACE Site NTS_067 Nevada Test Site (NTS_067)                                                                                        | 36.766667 | -115.95     | 390792833                  | 1036364                   | 14    | 0.036   |
| 2140918008    | Permafrost microbial communities from permafrost in Bonanza Creek, Alaska - Bog_all (Bog_all_CLC)                                                                             | 64.7      | -148.3      | 410522816                  | 696868                    | 5     | 0.012   |
| 2162886008    | Soil microbial communities from Puerto Rico rain forest, that decompose switchgrass - Feedstock-adapted consortia SG + Fe (SG + Fe, May 2011 assembly)                        | 18.3724   | -65.7166    | 154120208                  | 193491                    | 2     | 0.013   |
| 2209111000    | Soil microbial communities from Colorado Plateau, Greene Butte sample - Dark Crust, Colorado Plateau, Green Butte (Dark Crust, Colorado Plateau, Green Butte June 2011 assem) | 38.714972 | -109.692944 | 396718301                  | 1058313                   | 7     | 0.018   |
| 3300000596    | Amended soil microbial communities from Kansas Great Prairies, USA - Total DNA no BrdU F1.4TC (Kansas native prairie Total DNA no BrdU F1.4TC, April 2012 Assem)              | 39.100992 | -96.608258  | 118917357                  | 353727                    | 1     | 0.008   |
| 3300000956    | Soil microbial communities from Great Prairies - Kansas, Native Prairie soil (Kansas, Native Prairie soil, Sept. 2012 Assem JGI Velvet)                                       | 39.214012 | -96.585283  | 9280824611                 | 31876498                  | 1     | 0.000   |
| 3300001197    | Wastewater microbial communities from Syncrude, Ft. McMurray, Alberta - Microbes from Sediment core from a heavy oil                                                          | 56.04     | -118.13     | 89229498                   | 204944                    | 135   | 1.513   |

|            |                                                                                                                                                                            |            |             |           |        |   |       |
|------------|----------------------------------------------------------------------------------------------------------------------------------------------------------------------------|------------|-------------|-----------|--------|---|-------|
|            | reservoir, Alberta Canada Inniskillen 614.3<br>(Inniskillen 614.3: 454+illumina sequencing<br>assembly)                                                                    |            |             |           |        |   |       |
| 3300002468 | Deep subsurface microbial communities<br>from Mt. Terri Underground Rock<br>Laboratory, Switzerland -<br>10_samples_coassembly<br>(concoct_output_2nd_run)                 | 47.379     | 7.1648      | 143773111 | 146707 | 2 | 0.014 |
| 3300005258 | Microbial communities on the surface of<br>bentonite enhanced biochar (D2B)                                                                                                | -33.917926 | 151.235347  | 162951842 | 282734 | 4 | 0.025 |
| 3300005260 | Microbial communities on the surface of<br>kaolinite enhanced biochar from soil with<br>fertiliser in Sydney, Australia (F2B)                                              | -33.917926 | 151.235347  | 308772089 | 487956 | 5 | 0.016 |
| 2044078003 | Miscanthus field bulk soil microbial<br>communities from University of Illinois<br>Energy Farm, Urbana, IL (Bulk soil sample<br>from field growing Miscanthus x giganteus) | 40.109     | -88.204     | 58125848  | 165002 | 5 | 0.086 |
| 2067725009 | Permafrost microbial communities from<br>central Alaska, USA - Permafrost field<br>sample                                                                                  | 65.7906    | -149.9102   | 9656814   | 13277  | 0 | 0.000 |
| 2189573024 | Echo Passage metagenome                                                                                                                                                    | 31.837801  | -110.350292 | 138499921 | 365407 | 0 | 0.000 |
| 3300000044 | Arabidopsis rhizosphere microbial<br>communities from the University of North<br>Carolina - sample from Arabidopsis soil old<br>(Arabidopsis soil old, Nov 2011 assem)     | 35.9       | -79.05      | 92517998  | 280064 | 0 | 0.000 |
| 3300000597 | Forest soil microbial communities from<br>Amazon forest - 2010 replicate II A1<br>(Amazon Forest 2010 replicate II A1, April<br>2012 Assem)                                | -10.171667 | -62.7875    | 321952212 | 768309 | 0 | 0.000 |
| 3300000793 | Forest soil microbial communities from<br>Amazon forest - 2010 replicate II A001<br>(Amazon Forest 2010 replicate II A001,<br>March 2012 Assem)                            | -10.171667 | -62.7875    | 297027237 | 799655 | 0 | 0.000 |
| 3300000825 | Subaerial biofilm microbial communities from<br>sulfidic caves, Italy, that are extremely acidic<br>- Acquasanta AS5 (Draft assembly, stringent)                           | 42.755     | 13.411118   | 8590020   | 17561  | 0 | 0.000 |

| (mi 99 ml 60 rip)) |                                                                                                                    |            |             |           |         |   |       |
|--------------------|--------------------------------------------------------------------------------------------------------------------|------------|-------------|-----------|---------|---|-------|
| 3300001490         | Fosmid Clones Derived from Amazon Forest Soil Microbial Communities (Amazon Soil Fosmids Plate#2, June 2013 Assem) | -2.5871    | -49.041     | 3532881   | 3698    | 0 | 0.000 |
| 3300002157         | Saline desert soil microbial communities from Kutch, Gujarat, India - S6                                           | 23.940972  | 70.188444   | 300833452 | 2224072 | 0 | 0.000 |
| 3300003065         | Soil viral communities from Rice paddy at Daejon City                                                              | 36.3875    | 127.3392    | 611313    | 1249    | 0 | 0.000 |
| 3300003102         | Soil and Ice psychrophilic microbial communities from Leh Laddakh, India - psychrophilic sample                    | 34.1453972 | 77.5676139  | 3997411   | 11352   | 0 | 0.000 |
| 3300005699         | Soil microbial communities from Charlotte, North Carolina, that are pyrene degrading (re-annotation)               | 35.2269444 | -80.8433333 | 5507702   | 9489    | 0 | 0.000 |
| 3300006427         | Microbial communities of the formation fluids of a supercritical CO2 deposit from McElmo Dome, Colorado            | 39.7640021 | -           | 10773225  | 12085   | 0 | 0.000 |
| 3300006428         | Microbial communities of the formation fluids of a supercritical CO2 deposit from Well 3, McElmo Dome, Colorado    | 39.7640021 | -           | 26625403  | 30536   | 0 | 0.000 |

### Marine metagenomes

|            |                                                                                                                                                                                                            |           |             |   |   |    |     |
|------------|------------------------------------------------------------------------------------------------------------------------------------------------------------------------------------------------------------|-----------|-------------|---|---|----|-----|
| 3300000555 | Wetland microbial communities from Twitchell Island in the Sacramento Delta, sample from surface sediment Feb2011 Site A1 Bulk (Wetland Surface Sediment Feb2011 Site A1 Bulk-1% Merged Rds,0.27kb Insert) | 38.107057 | -121.647578 | 0 | 0 | 1  | n.d |
| 3300000573 | Wetland microbial communities from Twitchell Island in the Sacramento Delta, sample from surface sediment Feb2011 Site A1 Bulk (Wetland Surface Sediment Feb2011 Site A1 Bulk-1% Merged Rds,0.25kb Insert) | 38.107057 | -121.647578 | 0 | 0 | 1  | n.d |
| 3300002359 | Wetland sediment microbial communities                                                                                                                                                                     | 38.1072   | -121.6485   | 0 | 0 | 44 | n.d |

|            |                                                                                                                                                                 |            |             |           |         |    |        |
|------------|-----------------------------------------------------------------------------------------------------------------------------------------------------------------|------------|-------------|-----------|---------|----|--------|
|            | from Twitchell Island in the Sacramento Delta, sample from surface sediment Aug2011 Site B2 Bulk                                                                |            |             |           |         |    |        |
| 3300000444 | Marine sediment microbial community from La Parguera, Puerto Rico - PR Tt Sediment 1 (PR Tt Sediment 1 - Bioluminescent Bay in La ParagueraPR, July 2012 Assem) | 17.9675    | -67.018833  | 10852089  | 26822   | 1  | 0.0921 |
| 3300001939 | Marine microbial communities from Block Island, New York, USA - GS009                                                                                           | 41.09111   | -71.60222   | 37747991  | 70271   | 3  | 0.0795 |
| 3300006559 | Marine microbial communities from the Black Sea in Odessa region - Od_3 (Assembly)                                                                              | 46.440968  | 30.772294   | 15417702  | 57359   | 1  | 0.0649 |
| 3300001935 | Marine microbial communities from Northern Gulf of Maine, Canada - GS007                                                                                        | 43.63222   | -66.84722   | 32214377  | 54370   | 2  | 0.0621 |
| 3300000929 | Marine plume microbial communities from the Columbia River - 15 PSU (Columbia River plume metagenome 15 PSU)                                                    | 46.239     | -124.161    | 448564426 | 1055341 | 26 | 0.0580 |
| 3300003517 | Marine microbial communities from Antarctic Ocean - Station_363 -- 3.0 um (Cold Waters_1)                                                                       | -60.00007  | 141.23353   | 86297686  | 253569  | 5  | 0.0579 |
| 3300001969 | Marine microbial communities from Yucatan Channel, Mexico - GS017                                                                                               | 20.5225    | -85.41361   | 174719720 | 322314  | 10 | 0.0572 |
| 3300001964 | Marine microbial communities from Rosario Bank, Honduras - GS018                                                                                                | 18.036667  | -83.78472   | 105952902 | 195732  | 6  | 0.0566 |
| 3300001957 | Marine microbial communities from Wolf Island, Equador - GS035                                                                                                  | 1.3891667  | -91.81695   | 88794277  | 150749  | 5  | 0.0563 |
| 3300000928 | Marine plume microbial communities from the Columbia River - 25 PSU (Columbia River plume metagenome 25 PSU)                                                    | 46.233     | -124.16     | 465382374 | 999698  | 26 | 0.0559 |
| 3300000426 | Marine sediment microbial community from Union City, CA, USA - Pond 1C Sediment 3 (Pond 1C Sediment 3 Union City, June 2012 Assem)                              | 37.569083  | -122.103267 | 90642744  | 224856  | 5  | 0.0552 |
| 3300001938 | Marine microbial communities from Bedford Basin, Nova Scotia, Canada - GS005                                                                                    | 44.690277  | -63.637222  | 37780382  | 64231   | 2  | 0.0529 |
| 3300000101 | Marine microbial communities from Delaware Coast, sample from Delaware MO Early Summer May 2010 (Delaware MO                                                    | 39.0042816 | -77.1012173 | 647909234 | 1375242 | 31 | 0.0478 |

Early Summer May 2010, Feb 2012 assem)

|            |                                                                                                                                                                                                           |           |             |           |         |    |        |
|------------|-----------------------------------------------------------------------------------------------------------------------------------------------------------------------------------------------------------|-----------|-------------|-----------|---------|----|--------|
| 3300001952 | Marine microbial communities from Newport Harbor, Rhode Island, USA - GS008                                                                                                                               | 41.485832 | -71.35111   | 85651166  | 142390  | 4  | 0.0467 |
| 3300001941 | Marine microbial communities from Browns Bank, Gulf of Maine - GS003                                                                                                                                      | 42.85278  | -66.217224  | 43542027  | 80361   | 2  | 0.0459 |
| 3300001961 | Marine microbial communities from Dirty Rock, Cocos Island, Costa Rica - GS025                                                                                                                            | 5.552778  | -87.087776  | 88355364  | 163872  | 4  | 0.0453 |
| 3300001958 | Marine microbial communities from Gulf of Mexico, USA - GS016                                                                                                                                             | 24.174723 | -84.344444  | 88679928  | 152380  | 4  | 0.0451 |
| 3300001960 | Marine microbial communities from South of Charleston, South Carolina, USA - GS014                                                                                                                        | 32.506943 | -79.263885  | 90953628  | 159679  | 4  | 0.0440 |
| 3300000115 | Marine microbial communities from Delaware Coast, sample from Delaware MO Summer July 2011 (Delaware MO Summer July 2011, Nov 2011 assem)                                                                 | 38.848917 | -75.1076    | 524209194 | 1204138 | 22 | 0.0420 |
| 3300000864 | Marine plume microbial communities from the Columbia River - Metatranscriptome 25 PSU (Columbia River plume metatranscriptome 25 PSU)                                                                     | 46.235    | -124.16     | 24148901  | 56425   | 1  | 0.0414 |
| 3300000883 | Estuary microbial communities from the Columbia River - 5 PSU (Columbia River estuary metagenome 5 PSU)                                                                                                   | 46.235    | -123.91     | 339832607 | 816259  | 14 | 0.0412 |
| 3300001943 | Marine microbial communities from Cape May, New Jersey, USA - GS010                                                                                                                                       | 38.94     | -74.685     | 57052860  | 104685  | 2  | 0.0351 |
| 3300000093 | Wetland microbial communities from Twitchell Island in the Sacramento Delta, sample from surface sediment Feb2011 Site B2 Bulk (Wetland Surface Sediment Feb2011 Site B2 Bulk, Oct 2011 assem)            | 38.10726  | -121.648538 | 61310069  | 187990  | 2  | 0.0326 |
| 3300000312 | Wetland microbial communities from Twitchell Island in the Sacramento Delta, sample from surface sediment Feb2011 Site B2 Bulk (Wetland Surface Sediment Feb2011 Site B2 Bulk, Assem Ctgs Oct 2011 assem) | 38.10726  | -121.648538 | 61310069  | 187974  | 2  | 0.0326 |

|            |                                                                                                                                                                                                                   |           |             |           |         |    |        |
|------------|-------------------------------------------------------------------------------------------------------------------------------------------------------------------------------------------------------------------|-----------|-------------|-----------|---------|----|--------|
| 3300000116 | Marine microbial communities from Delaware Coast, sample from Delaware MO Spring March 2010 (Delaware MO Spring March 2010, Nov 2011 assem)                                                                       | 38.848917 | -75.1076    | 590073671 | 1417215 | 19 | 0.0322 |
| 3300001945 | Marine microbial communities from Galapagos, Equador - GS026                                                                                                                                                      | 1.2641667 | -90.295     | 63080825  | 112133  | 2  | 0.0317 |
| 3300000094 | Wetland microbial communities from Twitchell Island in the Sacramento Delta, sample from surface sediment Feb2011 Site A1 Tule (Wetland Surface Sediment Feb2011 Site A1 Tule, Oct 2011 assem)                    | 38.107057 | -121.647578 | 129333279 | 362721  | 4  | 0.0309 |
| 3300000311 | Wetland microbial communities from Twitchell Island in the Sacramento Delta, sample from surface sediment Feb2011 Site A1 Bulk (Wetland Surface Sediment Feb2011 Site A1 Bulk, Asm Ctgs IBYY,IYGG 2012 Mar Assem) | 38.107057 | -121.647578 | 243213055 | 583100  | 7  | 0.0288 |
| 3300000895 | Wetland microbial communities from Twitchell Island in the Sacramento Delta, sample from surface sediment Feb2011 Site A1 Bulk (Wetland Surface Sediment Feb2011 Site A1 Bulk, Ctgs/Rds IBYY,IYGG 2012 Mar Assem) | 38.107057 | -121.647578 | 243213055 | 583095  | 7  | 0.0288 |
| 3300001949 | Marine microbial communities from Panama City, Panama - GS022                                                                                                                                                     | 6.492778  | -82.90389   | 76322024  | 131400  | 2  | 0.0262 |
| 3300000310 | Wetland microbial communities from Twitchell Island in the Sacramento Delta, sample from surface sediment Feb2011 Site A1 Bulk (Wetland Surface Sediment Feb2011 Site A1 Bulk, Assem Ctgs IYGG 2012 March Assem)  | 38.107057 | -121.647578 | 120209763 | 331296  | 3  | 0.0250 |
| 3300000840 | Wetland microbial communities from Twitchell Island in the Sacramento Delta, sample from surface sediment Feb2011 Site A1 Bulk (Wetland Surface Sediment Feb2011 Site A1 Bulk, Ctgs/UnRds IYGG 2012 March Assem)  | 38.107057 | -121.647578 | 120209763 | 331295  | 3  | 0.0250 |

|            |                                                                                                                                                                                                                    |            |             |           |         |    |        |
|------------|--------------------------------------------------------------------------------------------------------------------------------------------------------------------------------------------------------------------|------------|-------------|-----------|---------|----|--------|
| 3300001940 | Marine microbial communities from Bay of Fundy, Nova Scotia, Canada - GS006                                                                                                                                        | 45.111668  | -64.94666   | 40280931  | 72308   | 1  | 0.0248 |
| 3300001956 | Marine microbial communities from Rangirora Atoll, Polynesia Archipelagos - GS051                                                                                                                                  | -15.143611 | -147.435    | 83225611  | 150651  | 2  | 0.0240 |
| 3300000786 | Wetland microbial communities from Twitchell Island in the Sacramento Delta, sample from surface sediment Feb2011 Site A2 Cattail (Wetland Surface Sediment Feb2011 Site A2 Cattail, Ctgs/UnReads Sept 2011 assem) | 38.107057  | -121.647578 | 84472288  | 260286  | 2  | 0.0237 |
| 3300001954 | Marine microbial communities from Colon, Panama - GS019                                                                                                                                                            | 10.716389  | -80.25445   | 86398015  | 149187  | 2  | 0.0231 |
| 3300001962 | Marine microbial communities from Cocos Island, Costa Rica - GS023                                                                                                                                                 | 5.64       | -86.56528   | 93108667  | 176476  | 2  | 0.0215 |
| 3300000117 | Marine microbial communities from Delaware Coast, sample from Delaware MO Winter December 2010 (Delaware MO Winter December 2010, Nov 2011 assem)                                                                  | 39.0042816 | -77.1012173 | 575155359 | 1341985 | 12 | 0.0209 |
| 3300000108 | Wetland microbial communities from Twitchell Island in the Sacramento Delta, sample from surface sediment Feb2011 Site A1 Bulk (Wetland Surface Sediment Feb2011 Site A1 Bulk, 2011 Sep Assem)                     | 38.107057  | -121.647578 | 208340005 | 570282  | 4  | 0.0192 |
| 3300000309 | Wetland microbial communities from Twitchell Island in the Sacramento Delta, sample from surface sediment Feb2011 Site A1 Bulk (Wetland Surface Sediment Feb2011 Site A1 Bulk, Assem Ctgs IBYY 2011 Sep Assem)     | 38.107057  | -121.647578 | 208340005 | 570282  | 4  | 0.0192 |
| 3300000854 | Wetland microbial communities from Twitchell Island in the Sacramento Delta, sample from surface sediment Feb2011 Site B2 Tule (Wetland Surface Sediment Feb2011 Site B2 Tule, Ctgs/UnReads Oct 2011 assem)        | 38.10726   | -121.648538 | 105539119 | 321832  | 2  | 0.0190 |

|            |                                                                                                                                                                                                                                                                                         |            |             |           |         |    |        |
|------------|-----------------------------------------------------------------------------------------------------------------------------------------------------------------------------------------------------------------------------------------------------------------------------------------|------------|-------------|-----------|---------|----|--------|
| 3300002053 | Marine sediment microbial communities from White Oak River estuary, North Carolina - WOR_SMTZ                                                                                                                                                                                           | 34.6478111 | -77.1112083 | 799007063 | 857807  | 12 | 0.0150 |
| 3300000894 | Wetland microbial communities from Twitchell Island in the Sacramento Delta, sample from surface sediment Feb2011 Site L1 Bulk (Wetland Surface Sediment Feb2011 Site L1 Bulk, Ctgs/UnReads Jan 2012 assem)                                                                             | 38.106796  | -121.646457 | 70007605  | 199148  | 1  | 0.0143 |
| 3300002961 | Wetland microbial communities from Twitchell Island in the Sacramento Delta, sample from surface sediment Feb2011 Site A1 Bulk (Wetland microbial communities from Twitchell Island in the Sacramento Delta, sample from surface sediment Feb2011 Site A1 Bulk, ASSEMBLY_DATE=20140701) | 38.107057  | -121.647578 | 560427570 | 1398510 | 8  | 0.0143 |
| 3300000917 | Wetland microbial communities from Twitchell Island in the Sacramento Delta, sample from surface sediment Feb2011 Site A2 Cattail (Wetland Surface Sediment Feb2011 Site A2 Cattail, Ctgs/UnRds Jan 2012 Assem)                                                                         | 38.107057  | -121.647578 | 146925476 | 408994  | 2  | 0.0136 |
| 3300003516 | Marine microbial communities from Antarctic ocean - Station_363 -- 0.8 um (Cold Waters_2)                                                                                                                                                                                               | -60.00007  | 141.23353   | 77909508  | 239389  | 1  | 0.0128 |
| 3300000077 | Wetland microbial communities from Twitchell Island in the Sacramento Delta, sample from surface sediment Feb2011 Site B1 Bulk (Wetland Surface Sediment Feb2011 Site B1 Bulk Feb 2012)                                                                                                 | 38.10726   | -121.648538 | 79467785  | 197107  | 1  | 0.0126 |
| 3300001968 | Marine microbial communities from Lake Gatun, Panama - GS020                                                                                                                                                                                                                            | 9.164444   | -79.83611   | 166403274 | 296358  | 2  | 0.0120 |
| 3300001955 | Marine microbial communities from Gulf of Panama, Panama - GS021                                                                                                                                                                                                                        | 8.129167   | -79.69111   | 85347158  | 150154  | 1  | 0.0117 |



|            |                                                                                                                                                                                                                                                                                                           |            |             |            |         |    |        |
|------------|-----------------------------------------------------------------------------------------------------------------------------------------------------------------------------------------------------------------------------------------------------------------------------------------------------------|------------|-------------|------------|---------|----|--------|
| 3300003432 | Wetland sediment microbial communities from Twitchell Island in the Sacramento Delta, sample from surface sediment Aug2011 Site B2 Bulk (Wetland sediment microbial communities from Twitchell Island in the Sacramento Delta, sample from surface sediment Aug2011 Site B2 Bulk, ASSEMBLY_DATE=20140909) | 38.1072    | -121.6485   | 2212415794 | 5001746 | 23 | 0.0104 |
| 3300003541 | Wetland sediment microbial communities from Twitchell Island in the Sacramento Delta, sample from surface sediment Aug2011 Site B2 Bulk (Wetland sediment microbial communities from Twitchell Island in the Sacramento Delta, sample from surface sediment Aug2011 Site B2 Bulk, ASSEMBLY_DATE=20141008) | 38.1072    | -121.6485   | 1842474917 | 3667351 | 18 | 0.0098 |
| 3300000092 | Wetland microbial communities from Twitchell Island in the Sacramento Delta, sample from surface sediment Feb2011 Site L2 Tule (Wetland Surface Sediment Feb2011 Site L2 Tule, Sep 2011 assem)                                                                                                            | 38.106796  | -121.646457 | 111737537  | 334657  | 1  | 0.0089 |
| 3300000317 | Wetland microbial communities from Twitchell Island in the Sacramento Delta, sample from surface sediment Feb2011 Site L2 Tule (Wetland Surface Sediment Feb2011 Site L2 Tule, Assem Ctgs Sep 2011 assem)                                                                                                 | 38.106796  | -121.646457 | 111737537  | 334653  | 1  | 0.0089 |
| 3300000425 | Marine microbial community from Union City, CA, USA - Pond 2C Liquid 2 (Pond 2C Liquid 2 Union City, July 2012 Assem)                                                                                                                                                                                     | 37.569017  | -122.102433 | 131906500  | 297522  | 1  | 0.0076 |
| 3300001965 | Marine microbial communities from Coastal Floreana, Equador - GS028                                                                                                                                                                                                                                       | -1.2169445 | -90.319725  | 135719211  | 247934  | 1  | 0.0074 |
| 3300000090 | Wetland microbial communities from Twitchell Island in the Sacramento Delta, sample from surface sediment Feb2011 Site B1 Cattail (Wetland Surface Sediment Feb2011 Site B1 Cattail, Sep 2011 assem)                                                                                                      | 38.10726   | -121.648538 | 291270262  | 747850  | 2  | 0.0069 |

|            |                                                                                                                                                                                                                   |           |             |           |        |   |        |
|------------|-------------------------------------------------------------------------------------------------------------------------------------------------------------------------------------------------------------------|-----------|-------------|-----------|--------|---|--------|
| 3300000313 | Wetland microbial communities from Twitchell Island in the Sacramento Delta, sample from surface sediment Feb2011 Site B1 Cattail (Wetland Surface Sediment Feb2011 Site B1 Cattail, Assem Ctgs Sep 2011 assem)   | 38.10726  | -121.648538 | 291270262 | 747866 | 2 | 0.0069 |
| 3300000030 | Wetland microbial communities from Twitchell Island in the Sacramento Delta, sample from surface sediment Feb2011 Site B1 Bulk (Wetland Surface Sediment Feb2011 Site B1 Bulk, Oct 2011 assem)                    | 38.10726  | -121.648538 | 153197283 | 433712 | 1 | 0.0065 |
| 3300001281 | Wetland microbial communities from Twitchell Island in the Sacramento Delta, sample from surface sediment Aug2011 Site A1 Bulk (Wetland Surface Sediment Aug2011 Site A1 Bulk Metagenome, ASSEMBLY_DATE=20130408) | 38.107    | -121.6475   | 173204638 | 479751 | 1 | 0.0058 |
| 3300000418 | Marine microbial community from Union City, CA, USA - Pond 2C Liquid 1 (Pond 2C Liquid 1 Union City, June 2012 Assem)                                                                                             | 37.569167 | -122.1019   | 194495031 | 424469 | 1 | 0.0051 |
| 3300000385 | Marine microbial community from Cabo Rojo, Puerto Rico - PR CR 10% Liquid 1 (PR CR 10% Liquid 1 Cabo Rojo PR, June 2012 Assem)                                                                                    | 17.951083 | -67.193167  | 210351197 | 409868 | 1 | 0.0048 |
| 3300003475 | Marine microbial communities from the Indian Ocean - GS112 (warm waters)                                                                                                                                          | -8.505    | 80.37556    | 224938505 | 730224 | 1 | 0.0044 |
| 3300000091 | Wetland microbial communities from Twitchell Island in the Sacramento Delta, sample from surface sediment Feb2011 Site L1 Cattail (Wetland Surface Sediment Feb2011 Site L1 Cattail, Sep 2011 assem)              | 38.106796 | -121.646457 | 296519018 | 679298 | 1 | 0.0034 |
| 3300000318 | Wetland microbial communities from Twitchell Island in the Sacramento Delta, sample from surface sediment Feb2011 Site L1 Cattail (Wetland Surface Sediment Feb2011 Site L1 Cattail, Assem Ctgs Sep 2011 assem)   | 38.106796 | -121.646457 | 296519018 | 679305 | 1 | 0.0034 |

|            |                                                                                                                                                                                                                 |            |             |          |        |   |        |
|------------|-----------------------------------------------------------------------------------------------------------------------------------------------------------------------------------------------------------------|------------|-------------|----------|--------|---|--------|
| 2199352009 | Marine subseafloor sediment microbial communities, sample from White Oak River Estuary, NC, USA 14E (White Oak River Estuary June 2011 assem)                                                                   | 34.690251  | -77.106571  | 22398301 | 51820  | 0 | 0.0000 |
| 3300000100 | Wetland microbial communities from Twitchell Island in the Sacramento Delta, sample from surface Sediment Feb2011 Site B2 Cattail (Wetland Surface Sediment Feb2011 Site B2 Cattail, Oct 2011 assem)            | 38.10726   | -121.648538 | 90589564 | 284067 | 0 | 0.0000 |
| 3300000316 | Wetland microbial communities from Twitchell Island in the Sacramento Delta, sample from surface Sediment Feb2011 Site B2 Cattail (Wetland Surface Sediment Feb2011 Site B2 Cattail, Assem Ctgs Oct 2011 assem) | 38.10726   | -121.648538 | 90589564 | 284068 | 0 | 0.0000 |
| 3300000320 | Marine microbial communities from Delaware Coast, sample from Delaware MO Early Summer May 2010                                                                                                                 | 39.0042816 | -77.1012173 | 3880822  | 10893  | 0 | 0.0000 |
| 3300000321 | Marine microbial communities from Delaware Coast, sample from Delaware MO Winter December 2010                                                                                                                  | 39.0042816 | -77.1012173 | 11256121 | 45129  | 0 | 0.0000 |
| 3300000369 | Marine microbial community from Union City, CA, USA - Pond 2C Liquid 3 (Pond 2C Liquid 3 Union City, June 2012 Assem)                                                                                           | 37.568817  | -122.10315  | 17102308 | 18170  | 0 | 0.0000 |
| 3300000371 | Marine microbial community from Union City, CA, USA - Pond 1C Liquid 3 (Pond 1C Liquid 3 Union City, June 2012 Assem)                                                                                           | 37.5693    | -122.102517 | 47212914 | 125124 | 0 | 0.0000 |
| 3300000403 | Marine sediment microbial community from La Parguera, Puerto Rico - PR Tt Sediment 2 (PR Tt Sediment 2 - Bioluminescent Bay in La ParagueraPR, July 2012 Assem)                                                 | 17.967317  | -67.018833  | 898328   | 2770   | 0 | 0.0000 |
| 3300000409 | Marine sediment microbial community from Union City, CA, USA - Pond 2C Sediment 1 (Pond 2C Sediment 1 Union City, June 2012 Assem)                                                                              | 37.569167  | -122.1019   | 24779847 | 77851  | 0 | 0.0000 |
| 3300000463 | Marine sediment microbial community from Union City, CA, USA - Pond 2C Sediment 3                                                                                                                               | 37.568817  | -122.10315  | 38427200 | 111900 | 0 | 0.0000 |

|            |                                                                                                                                                                                                                            |            |             |           |        |   |        |
|------------|----------------------------------------------------------------------------------------------------------------------------------------------------------------------------------------------------------------------------|------------|-------------|-----------|--------|---|--------|
|            | (Pond 2C Sediment 3 Union City, June 2012 Assem)                                                                                                                                                                           |            |             |           |        |   |        |
| 3300000517 | Marine microbial community from Cabo Rojo, Puerto Rico - PR CR 10% Liquid 3 (PR CR 10% Liquid 3 Cabo Rojo PR, June 2012 Assem)                                                                                             | 17.950617  | -67.193417  | 120470807 | 242233 | 0 | 0.0000 |
| 3300000853 | Marine plume microbial communities from the Columbia River - Metatranscriptome 15 PSU (Columbia River plume metatranscriptome 15 PSU)                                                                                      | 46.239     | -124.161    | 7327946   | 18177  | 0 | 0.0000 |
| 3300000867 | Estuary microbial communities from the Columbia River - metatranscriptome 5 PSU (Columbia River estuary metatranscriptome 5 PSU)                                                                                           | 46.235     | -123.91     | 58151542  | 137277 | 0 | 0.0000 |
| 3300001279 | Wetland sediment microbial communities from Twitchell Island in the Sacramento Delta, sample from surface sediment Aug2011 Site B2 Bulk (Wetland Surface Sediment Aug2011 Site B2 Bulk Metagenome, ASSEMBLY_DATE=20130408) | 38.1072    | -121.6485   | 217817654 | 615872 | 0 | 0.0000 |
| 3300001922 | Marine microbial communities from Polynesia - GS046                                                                                                                                                                        | -9.571111  | -131.49167  | 336890    | 629    | 0 | 0.0000 |
| 3300001923 | Marine microbial communities from the Tropical South Pacific Ocean - GS038                                                                                                                                                 | -2.5819445 | -97.85139   | 451181    | 795    | 0 | 0.0000 |
| 3300001924 | Marine microbial communities from Tikehau Lagoon, Polynesia Archipelagos - GS050                                                                                                                                           | -15.277778 | -148.22444  | 467458    | 887    | 0 | 0.0000 |
| 3300001925 | Marine microbial communities from the Tropical South Pacific Ocean - GS041                                                                                                                                                 | -5.93      | -108.68694  | 494549    | 909    | 0 | 0.0000 |
| 3300001926 | Marine microbial communities from the Tropical South Pacific Ocean - GS042                                                                                                                                                 | -7.1075    | -116.11916  | 542583    | 953    | 0 | 0.0000 |
| 3300001927 | Marine microbial communities from Polynesia - GS044                                                                                                                                                                        | -8.415     | -124.23972  | 562395    | 1015   | 0 | 0.0000 |
| 3300001928 | Marine microbial communities from the Tropical South Pacific Ocean - GS043                                                                                                                                                 | -7.661111  | -116.11916  | 612652    | 1073   | 0 | 0.0000 |
| 3300001930 | Marine microbial communities from the Tropical South Pacific Ocean - GS039                                                                                                                                                 | -3.3433332 | -101.373886 | 641644    | 1142   | 0 | 0.0000 |

|            |                                                                                                                                                   |            |             |          |        |   |        |
|------------|---------------------------------------------------------------------------------------------------------------------------------------------------|------------|-------------|----------|--------|---|--------|
| 3300001931 | Marine microbial communities from Polynesia - GS045                                                                                               | -9.0175    | -127.76722  | 636185   | 1152   | 0 | 0.0000 |
| 3300001932 | Marine microbial communities from Moorea, Cooks Bay, Polynesia Archipelagos - GS049                                                               | -17.453056 | -149.79889  | 638416   | 1194   | 0 | 0.0000 |
| 3300001933 | Marine microbial communities from Moorea, Cooks Bay - GS048a                                                                                      | -17.475834 | -149.81223  | 666592   | 1245   | 0 | 0.0000 |
| 3300001936 | Marine microbial communities from Halifax, Nova Scotia, Canada - GS004                                                                            | 44.137222  | -63.644444  | 33043040 | 56286  | 0 | 0.0000 |
| 3300001937 | Marine microbial communities from the Equatorial Pacific Ocean - GS037                                                                            | -1.9738889 | -95.014725  | 36191958 | 63262  | 0 | 0.0000 |
| 3300001947 | Marine microbial communities from the Gulf of Maine, Canada - GS002                                                                               | 42.503056  | -67.24      | 74202974 | 125810 | 0 | 0.0000 |
| 3300001950 | Marine microbial communities from Delaware Bay, New Jersey, USA - GS011                                                                           | 39.417778  | -75.504166  | 79799345 | 138086 | 0 | 0.0000 |
| 3300001953 | Marine microbial communities from Key West, Florida, USA - GS015                                                                                  | 24.488333  | -83.07      | 84693422 | 146422 | 0 | 0.0000 |
| 3300001959 | Mangrove swamp microbial communities from Isabella Island, Equador - GS032                                                                        | -0.5938889 | -91.06944   | 89398486 | 153552 | 0 | 0.0000 |
| 3300003066 | Marine Synechococcus microbial communities from coastal surface water at La Jolla, California, USA - SRS00536                                     | 32.850317  | -117.27494  | 307378   | 1337   | 0 | 0.0000 |
| 3300003073 | Marine surface microbial communities Puget Sound, Washington, USA                                                                                 | 47.6906558 | -122.404411 | 2059964  | 1892   | 0 | 0.0000 |
| 3300003098 | Marine microbial communities from surface seawater at Gulf of Maine                                                                               | 43.14      | -68.33      | 5278992  | 8597   | 0 | 0.0000 |
| 3300003139 | Mat microbial community in the pink berry consortia of the Sippewissett salt marsh                                                                | 41.575836  | -70.63923   | 33200272 | 56503  | 0 | 0.0000 |
| 3300004831 | Marine surface microbial communities from the North Atlantic Ocean - filtered matter                                                              | 41.226956  | -8.720528   | 27429400 | 84353  | 0 | 0.0000 |
| 3300005472 | Wetland microbial communities from Twitchell Island in the Sacramento Delta, sample from surface sediment Feb2011 Site L1 Cattail (re-annotation) | 38.106796  | -121.646457 | 2364101  | 2630   | 0 | 0.0000 |
| 3300005698 | Marine microbial communities from six Antarctic regions - DNA Fragments (re-annotation)                                                           | -64.766667 | -64.05      | 43087    | 39     | 0 | 0.0000 |

|            |                                                                                                                                                              |           |           |          |        |   |        |
|------------|--------------------------------------------------------------------------------------------------------------------------------------------------------------|-----------|-----------|----------|--------|---|--------|
| 3300005722 | Marine Trichodesmium cyanobacterial communities from the North Pacific Subtropical Gyre outside Oahu, HI, sample from new species B colonies (re-annotation) | 22.75     | -158      | 27189071 | 39432  | 0 | 0.0000 |
| 3300006561 | Marine microbial communities from the Black Sea in Odessa region - Od_1 (Assembly)                                                                           | 46.35116  | 30.5519   | 22413229 | 75560  | 0 | 0.0000 |
| 3300006562 | Marine microbial communities from the Black Sea in Odessa region - Od_2 (Assembly)                                                                           | 46.302094 | 30.668915 | 31351919 | 105939 | 0 | 0.0000 |

---
